# Supplementary material for: AI-Based Homology Modelling of Fatty Acid Transport Protein 1 Using AlphaFold: Structural Elucidation and Molecular Dynamics Exploration
Source: MDPI journal article supplement (doi:10.3390/biom13111670), 2023-11-20
Supplement: s1 [file s1]

### Supplementary material:

**Table S1:** Interactomics analysis of hub gene showing 54 Interactors involved Functional enrichment analysis of FATP1.

| S. No. | Interactor | Organism            | Aliases                                                  | Description                                                  |
|--------|------------|---------------------|----------------------------------------------------------|--------------------------------------------------------------|
| 1.     | RPE65      | <i>Homo Sapiens</i> | rd12, LCA2, RP20, BCO3, sRPE65, mRPE65                   | Retinal pigment epithelium-specific protein 65kda            |
| 2.     | ARMC6      | <i>Homo Sapiens</i> | R30923_1                                                 | Armadillo repeat containing 6                                |
| 3.     | ARSF       | <i>Homo Sapiens</i> | ASF                                                      | Arylsulfatase F                                              |
| 4.     | ASIC4      | <i>Homo Sapiens</i> | BNAC4, ACCN4                                             | Acid-sensing (proton-gated) ion channel family member 4      |
| 5.     | ATP2A1     | <i>Homo Sapiens</i> | ATP2A, SERCA1                                            | Atpase, Ca++ transporting, cardiac muscle, fast twitch 1     |
| 6.     | C1ORF210   | <i>Homo Sapiens</i> | TEMP                                                     | Chromosome 1 open reading frame 210                          |
| 7.     | C3ORF52    | <i>Homo Sapiens</i> | TTMP                                                     | Chromosome 3 open reading frame 52                           |
| 8.     | CA6        | <i>Homo Sapiens</i> | CA-VI, GUSTIN, RP3-477M7.7                               | Carbonic anhydrase VI                                        |
| 9.     | CD79A      | <i>Homo Sapiens</i> | IGA, MB-1                                                | CD79a molecule, Immunoglobulin-associated alpha              |
| 10.    | CHRNA1     | <i>Homo Sapiens</i> | FCCMS, SCCMS, CMS2A, CHRNA, ACHRA, ACHRD                 | Cholinergic receptor, Nicotinic, alpha 1 (muscle)            |
| 11.    | CXCR3      | <i>Homo Sapiens</i> | GPR9, MigR, Mig-R, CD183, CD182, CKR-L2, IP10-R, CMKAR3  | Chemokine (C-X-C motif) receptor 3                           |
| 12.    | DGAT2      | <i>Homo Sapiens</i> | ARAT, HMFN1045, GS1999FULL                               | Diacylglycerol O-acyltransferase 2                           |
| 13.    | DYM        | <i>Homo Sapiens</i> | DMC, SMC                                                 | Dymeclin                                                     |
| 14.    | ERAP1      | <i>Homo Sapiens</i> | ALAP, ARTS1, A-LAP, ERAAP, ERAAP1, ARTS-1, PILSAP APPILS | Endoplasmic reticulum aminopeptidase 1                       |
| 15.    | EVA1C      | <i>Homo Sapiens</i> | B19, B18, SUE21, PRED34, FAM176C, C21orf64, C21orf63     | Eva-1 homolog C (C. Elegans)                                 |
| 16.    | FFAR1      | <i>Homo Sapiens</i> | GPR40, FFA1R, GPCR40                                     | Free fatty acid receptor 1                                   |
| 17.    | FSD2       | <i>Homo Sapiens</i> | SPRYD1                                                   | Fibronectin type III and SPRY domain containing 2            |
| 18.    | GPR182     | <i>Homo Sapiens</i> | AMR, AM-R, 7TMR, G10D, ADMR, gamrh, hrhAMR               | G protein-coupled receptor 182                               |
| 19.    | HNRNPH1    | <i>Homo Sapiens</i> | HNRPH, hnRNPH, HNRPH1                                    | Heterogeneous nuclear ribonucleoprotein H1 (H)               |
| 20.    | INS        | <i>Homo Sapiens</i> | IDDM, ILPR, IRDN, IDDM2, IDDM1, MODY10                   | Insulin                                                      |
| 21.    | ITM2C      | <i>Homo Sapiens</i> | E25, E25C, BRI3, ITM3, BRICD2C, hucep-14                 | Integral membrane protein 2C                                 |
| 22.    | LDLRAD1    | <i>Homo Sapiens</i> | -                                                        | Low-density lipoprotein receptor class A domain containing 1 |

|     |          |                     |                                                            |                                                                |
|-----|----------|---------------------|------------------------------------------------------------|----------------------------------------------------------------|
| 23. | LGR4     | <i>Homo Sapiens</i> | GPR48, BNMD17                                              | Leucine-rich repeat-containing G protein-coupled receptor 4    |
| 24. | LPAR2    | <i>Homo Sapiens</i> | EDG4, LPA2, LPA-2, EDG-4                                   | Lysophosphatidic acid receptor 2                               |
| 25. | LRRC55   | <i>Homo Sapiens</i> | -                                                          | Leucine-rich repeat containing 55                              |
| 26. | LRRC61   | <i>Homo Sapiens</i> | HSPC295                                                    | Leucine-rich repeat containing 61                              |
| 27. | LRRTM1   | <i>Homo Sapiens</i> | UNQ675/PRO1309                                             | Leucine-rich repeat transmembrane neuronal 1                   |
| 28. | MDFI     | <i>Homo Sapiens</i> | I-MF, I-mfa, RP4-696P19.1                                  | Myod family inhibitor                                          |
| 29. | MPL      | <i>Homo Sapiens</i> | MPLV, TPOR, CD110, C-MPL, THCYT2, RP1-92O14.1              | MPL proto-oncogene, thrombopoietin receptor                    |
| 30. | NUBP2    | <i>Homo Sapiens</i> | CFD1, NUBP1, NBP 2                                         | Nucleotide-binding protein 2                                   |
| 31. | OR7D2    | <i>Homo Sapiens</i> | OR19-4, OR19-10, HTPCRH03                                  | Olfactory receptor, family 7, subfamily D, member 2            |
| 32. | P3H4     | <i>Homo Sapiens</i> | SC65, NO55, NOL55, LEPREL4                                 | Prolyl 3-hydroxylase family member 4 (non-enzymatic)           |
| 33. | PBXIP1   | <i>Homo Sapiens</i> | HPIP, RP11-307C12.2                                        | Pre-B-cell leukaemia homeobox interacting protein 1            |
| 34. | PCDHGC4  | <i>Homo Sapiens</i> | PCDH-GAMMA-C4                                              | Protocadherin gamma subfamily C, 4                             |
| 35. | PEX19    | <i>Homo Sapiens</i> | PXF, PMP1, HK33, PMPI, PXMP1, PBD12A, D1S2223E,OK/SW-cl.22 | Peroxisomal biogenesis factor 19                               |
| 36. | PIGH     | <i>Homo Sapiens</i> | GPI-H                                                      | Phosphatidylinositol glycan anchor biosynthesis, class H       |
| 37. | PLA2G10  | <i>Homo Sapiens</i> | SPLA2, GXPLA2, GXSPLA2                                     | Phospholipase A2, group X                                      |
| 38. | PRAMEF1  | <i>Homo Sapiens</i> | -                                                          | PRAME family member 12                                         |
| 39. | PRSS8    | <i>Homo Sapiens</i> | CAP1, PROSTASIN                                            | Protease, serine, 8                                            |
| 40. | RNF4     | <i>Homo Sapiens</i> | SLX5, SNURF, RES4-26                                       | Ring finger protein 4                                          |
| 41. | SLC22A9  | <i>Homo Sapiens</i> | OAT4, OAT7, ust3, HOAT4, UST3H                             | Solute carrier family 22 (organic anion transporter), member 9 |
| 42. | SLC39A4  | <i>Homo Sapiens</i> | AEZ, ZIP4, AWMS2                                           | Solute carrier family 39 (zinc transporter), member 4          |
| 43. | SYP      | <i>Homo Sapiens</i> | MRX96, MRXSYP                                              | Synaptophysin                                                  |
| 44. | TAPBP    | <i>Homo Sapiens</i> | TPN, TAPA, TPSN, NGS17, DADB-159G18.7                      | TAP binding protein (tapasin)                                  |
| 45. | TLR9     | <i>Homo Sapiens</i> | CD289, UNQ5798/PRO19605                                    | Toll-like receptor 9                                           |
| 46. | TOR1AIP2 | <i>Homo Sapiens</i> | NET9, LULL1, IFRG15, RP11-12M5.5                           | Torsin A interacting protein 2                                 |
| 47. | TPP1\    | <i>Homo Sapiens</i> | LPIC, GIG1, CLN2, TPP-1, SCAR7                             | Tripeptidyl peptidase I                                        |
| 48. | TRIM67   | <i>Homo Sapiens</i> | TNL                                                        | Tripartite motif containing 67                                 |
| 49. | TSPAN15  | <i>Homo Sapiens</i> | NET7, NET-7, TM4SF15, 2700063A19Rik, UNQ677/PRO1311        | Tetraspanin 15                                                 |
| 50. | TTYH1    | <i>Homo Sapiens</i> | XXbac-BCX535A19.1                                          | Tweety family member 1                                         |
| 51. | TTYH3    | <i>Homo Sapiens</i> | -                                                          | Tweety family member 3                                         |

---

|     |         |                     |                                |                                      |
|-----|---------|---------------------|--------------------------------|--------------------------------------|
| 52. | UBE4A   | <i>Homo Sapiens</i> | E4, UFD2, UBOX2                | Ubiquitination factor E4A            |
| 53. | ZDHHC12 | <i>Homo Sapiens</i> | ZNF400, RP11-545E17.12-002     | Zinc finger, DHHC-type containing 12 |
| 54. | ZNRF4   | <i>Homo Sapiens</i> | spzn, RNF204, Ssrzf1, SPERIZIN | Zinc and ring finger 4               |

---

**Table S2:** Interactomic analysis of hub gene showing A Total of 55 Interactions involved Functional enrichment analysis of FATP1.

| S. No. | Interactors | Organism            | Experimental Evidence Code | Dataset                   | Throug hput | HTP Score |
|--------|-------------|---------------------|----------------------------|---------------------------|-------------|-----------|
| 1.     | ARMC6       | <i>Homo Sapiens</i> | Affinity Capture-MS        | Huttlin EL (2021/pre-pub) | High        | 0.4723    |
| 2.     | ARSF        | <i>Homo Sapiens</i> | Affinity Capture-MS        | Huttlin EL (2021/pre-pub) | High        | 0.7116    |
| 3.     | ASIC4       | <i>Homo Sapiens</i> | Affinity Capture-MS        | Huttlin EL (2021/pre-pub) | High        | 0.5563    |
| 4.     | ATP2A1      | <i>Homo Sapiens</i> | Affinity Capture-MS        | Huttlin EL (2021/pre-pub) | High        | 0.9202    |
| 5.     | C1ORF210    | <i>Homo Sapiens</i> | Affinity Capture-MS        | Huttlin EL (2021)         | High        | 0.9685    |
| 6.     | C3ORF52     | <i>Homo Sapiens</i> | Affinity Capture-MS        | Huttlin EL (2021)         | High        | 0.997     |
| 7.     | CA6         | <i>Homo Sapiens</i> | Affinity Capture-MS        | Huttlin EL (2021)         | High        | 0.9977    |
| 8.     | CD79A       | <i>Homo Sapiens</i> | Affinity Capture-MS        | Huttlin EL (2021)         | High        | 0.8251    |
| 9.     | CHRNA1      | <i>Homo Sapiens</i> | Affinity Capture-MS        | Huttlin EL (2021)         | High        | 0.9991    |
| 10.    | CXCR3       | <i>Homo Sapiens</i> | Affinity Capture-MS        | Huttlin EL (2021/pre-pub) | High        | 0.8912    |
| 11.    | DGAT2       | <i>Homo Sapiens</i> | Affinity Capture-Western   | Zhao YG (2017)            | Low         | -         |
| 12.    | DYM         | <i>Homo Sapiens</i> | Affinity Capture-MS        | Huttlin EL (2021/pre-pub) | High        | 0.6949    |
| 13.    | ERAP1       | <i>Homo Sapiens</i> | Affinity Capture-MS        | Huttlin EL (2021/pre-pub) | High        | 0.8383    |
| 14.    | EVA1C       | <i>Homo Sapiens</i> | Affinity Capture-MS        | Huttlin EL (2021)         | High        | 0.9083    |
| 15.    | FFAR1       | <i>Homo Sapiens</i> | Affinity Capture-MS        | Huttlin EL (2021)         | High        | 0.9413    |
| 16.    | FSD2        | <i>Homo Sapiens</i> | Affinity Capture-MS        | Huttlin EL (2021/pre-pub) | High        | 0.8771    |
| 17.    | GPR182      | <i>Homo Sapiens</i> | Affinity Capture-MS        | Huttlin EL (2021)         | High        | 0.9056    |
| 18.    | HNRNPH1     | <i>Homo Sapiens</i> | Affinity Capture-RNA       | Uren PJ (2016)            | High        | -         |
| 19.    | INS         | <i>Homo Sapiens</i> | Affinity Capture-MS        | Tran DT (2020)            | High        | -         |
| 20.    | ITM2C       | <i>Homo Sapiens</i> | Affinity Capture-MS        | Huttlin EL (2021)         | High        | 0.7686    |
| 21.    | LDLRAD1     | <i>Homo Sapiens</i> | Affinity Capture-MS        | Huttlin EL (2021)         | High        | 0.9917    |
| 22.    | LGR4        | <i>Homo Sapiens</i> | Affinity Capture-MS        | Huttlin EL (2021)         | High        | 0.9328    |
| 23.    | LPAR2       | <i>Homo Sapiens</i> | Affinity Capture-MS        | Huttlin EL (2021)         | High        | 0.9143    |
| 24.    | LRRC55      | <i>Homo Sapiens</i> | Affinity Capture-MS        | Huttlin EL (2021/pre-pub) | High        | 0.3696    |
| 25.    | LRRC61      | <i>Homo Sapiens</i> | Affinity Capture-MS        | Huttlin EL (2021/pre-pub) | High        | 0.7056    |
| 26.    | LRRTM1      | <i>Homo Sapiens</i> | Affinity Capture-MS        | Huttlin EL (2021/pre-pub) | High        | 0.7671    |
| 27.    | MDFI        | <i>Homo Sapiens</i> | Affinity Capture-MS        | Huttlin EL (2021/pre-pub) | High        | 0.8855    |
| 28.    | MPL         | <i>Homo Sapiens</i> | Affinity Capture-MS        | Huttlin EL (2021/pre-pub) | High        | 0.5039    |
| 29.    | NUBP2       | <i>Homo Sapiens</i> | Affinity Capture-MS        | Huttlin EL (2021/pre-pub) | High        | 0.4835    |

|     |          |                     |                          |                           |      |        |
|-----|----------|---------------------|--------------------------|---------------------------|------|--------|
| 30. | OR7D2    | <i>Homo Sapiens</i> | Affinity Capture-MS      | Huttlin EL (2021/pre-pub) | High | 0.3996 |
| 31. | P3H4     | <i>Homo Sapiens</i> | Affinity Capture-MS      | Huttlin EL (2021/pre-pub) | High | 0.6509 |
| 32. | PBXIP1   | <i>Homo Sapiens</i> | Affinity Capture-MS      | Huttlin EL (2021)         | High | 1      |
| 33. | PCDHGC4  | <i>Homo Sapiens</i> | Affinity Capture-MS      | Huttlin EL (2021/pre-pub) | High | 0.985  |
| 34. | PEX19    | <i>Homo Sapiens</i> | Affinity Capture-MS      | Huttlin EL (2021)         | High | 0.9564 |
| 35. | PIGH     | <i>Homo Sapiens</i> | Affinity Capture-MS      | Huttlin EL (2021)         | High | 0.9921 |
| 36. | PLA2G10  | <i>Homo Sapiens</i> | Affinity Capture-MS      | Huttlin EL (2021/pre-pub) | High | 0.8926 |
| 37. | PRAMEF12 | <i>Homo Sapiens</i> | Affinity Capture-MS      | Huttlin EL (2021/pre-pub) | High | 0.3767 |
| 38. | PRSS8    | <i>Homo Sapiens</i> | Affinity Capture-MS      | Huttlin EL (2021/pre-pub) | High | 0.6422 |
| 39. | RNF4     | <i>Homo Sapiens</i> | Affinity Capture-MS      | Kumar R (2017)            | High | -      |
| 40. | RPE65    | <i>Homo Sapiens</i> | Affinity Capture-Western | Guignard TJ (2010)        | Low  | -      |
| 41. | RPE65    | <i>Homo Sapiens</i> | Reconstituted Complex    | Guignard TJ (2010)        | Low  | -      |
| 42. | SLC22A9  | <i>Homo Sapiens</i> | Affinity Capture-MS      | Huttlin EL (2021)         | High | 0.7676 |
| 43. | SLC39A4  | <i>Homo Sapiens</i> | Affinity Capture-MS      | Huttlin EL (2021)         | High | 0.905  |
| 44. | SYP      | <i>Homo Sapiens</i> | Affinity Capture-MS      | Huttlin EL (2021)         | High | 0.9652 |
| 45. | TAPBP    | <i>Homo Sapiens</i> | Affinity Capture-MS      | Huttlin EL (2021/pre-pub) | High | 0.5875 |
| 46. | TLR9     | <i>Homo Sapiens</i> | Affinity Capture-MS      | Huttlin EL (2021/pre-pub) | High | 0.6826 |
| 47. | TOR1AIP2 | <i>Homo Sapiens</i> | Affinity Capture-MS      | Huttlin EL (2021/pre-pub) | High | 0.9512 |
| 48. | TPP1     | <i>Homo Sapiens</i> | Affinity Capture-MS      | Huttlin EL (2021/pre-pub) | High | 0.6289 |
| 49. | TRIM67   | <i>Homo Sapiens</i> | Affinity Capture-MS      | Demirdizen E (2022)       | High | -      |
| 50. | TSPAN15  | <i>Homo Sapiens</i> | Affinity Capture-MS      | Huttlin EL (2021)         | High | 0.9936 |
| 51. | TTYH1    | <i>Homo Sapiens</i> | Affinity Capture-MS      | Huttlin EL (2021/pre-pub) | High | 0.9973 |
| 52. | TTYH3    | <i>Homo Sapiens</i> | Affinity Capture-MS      | Huttlin EL (2021/pre-pub) | High | 0.4954 |
| 53. | UBE4A    | <i>Homo Sapiens</i> | Affinity Capture-MS      | Huttlin EL (2021/pre-pub) | High | 0.428  |
| 54. | ZDHHC12  | <i>Homo Sapiens</i> | Affinity Capture-MS      | Huttlin EL (2021)         | High | 0.8921 |
| 55. | ZNRF4    | <i>Homo Sapiens</i> | Affinity Capture-MS      | Huttlin EL (2021/pre-pub) | High | 0.9257 |

**Table S3.** Molecular Functions involved in Functional enrichment analysis.

| <b>GO-TERM</b> | <b>Description</b>                                  | <b>Count in network</b> | <b>Strength</b> | <b>False discovery rate</b> |
|----------------|-----------------------------------------------------|-------------------------|-----------------|-----------------------------|
|                | RNA polymerase II-specific DNA-binding              |                         |                 |                             |
| GO:0061629     | transcription factor binding                        | 5 of 283                | 1.5             | 0.00046                     |
| GO:0140110     | Transcription regulator activity                    | 6 of 1657               | 0.81            | 0.0225                      |
| GO:0047676     | arachidonate-CoA ligase activity                    | 2 of 11                 | 2.51            | 0.0066                      |
| GO:0030374     | Nuclear receptor transcription coactivator activity | 4 of 54                 | 2.12            | 7.29E-05                    |
| GO:0017162     | Aryl hydrocarbon receptor binding                   | 2 of 9                  | 2.6             | 0.0057                      |
| GO:0016922     | Nuclear receptor binding                            | 4 of 114                | 1.8             | 0.00046                     |
| GO:0004467     | Long-chain fatty acid-CoA ligase activity           | 2 of 13                 | 2.44            | 0.0081                      |
| GO:0003713     | Transcription coactivator activity                  | 5 of 316                | 1.45            | 0.00046                     |
| GO:0003682     | Chromatin binding                                   | 4 of 570                | 1.1             | 0.0349                      |
| GO:0140110     | Transcription regulator activity                    | 6 of 1657               | 0.81            | 0.0225                      |
|                | RNA polymerase II intronic transcription            |                         |                 |                             |
| GO:0001162     | regulatory region sequence-specific DNA binding     | 2 of 13                 | 2.44            | 0.0081                      |
|                | RNA polymerase II-specific DNA-binding              |                         |                 |                             |
| GO:0061629     | transcription factor binding                        | 5 of 283                | 1.5             | 0.00046                     |

## Figures

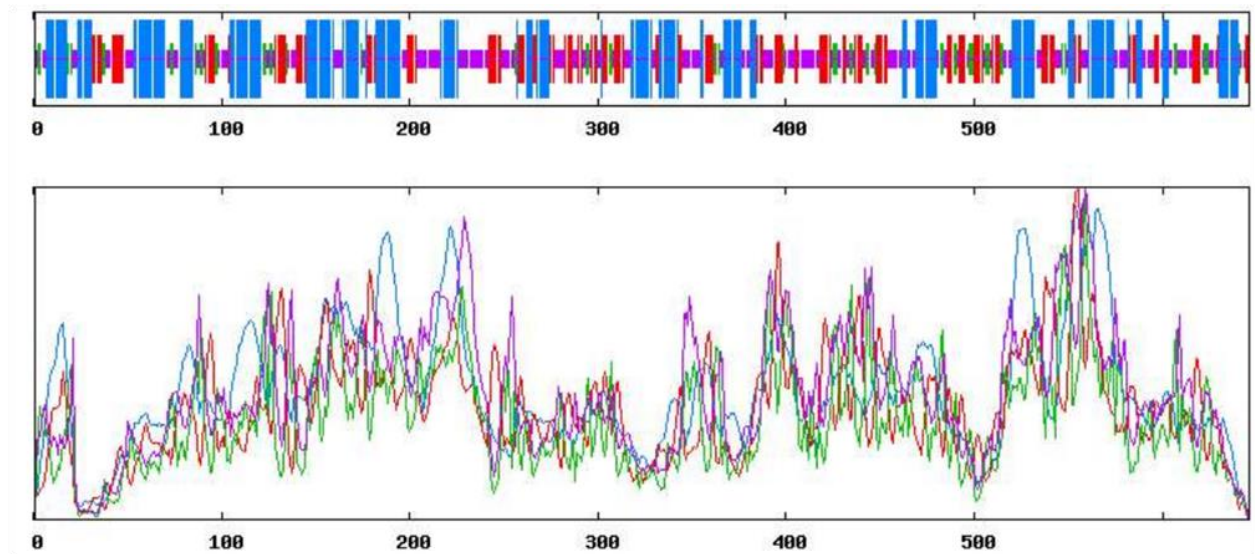

**Figure S1:** The secondary structure prediction results for the FATP1 protein. The improved self-optimized prediction method (SOPMA) software was used to predict the secondary structure of the FATP1 protein. Which was largely made up of random coils (33.44%), followed by helix (34.98%), extended strand (22.91%), and turns (8.67%). Lines in different colours represent different secondary structures: Blue,  $\alpha$  helix; green,  $\beta$  turn; red, extended strand; and purple, random coil. Fatty acid transport protien1.

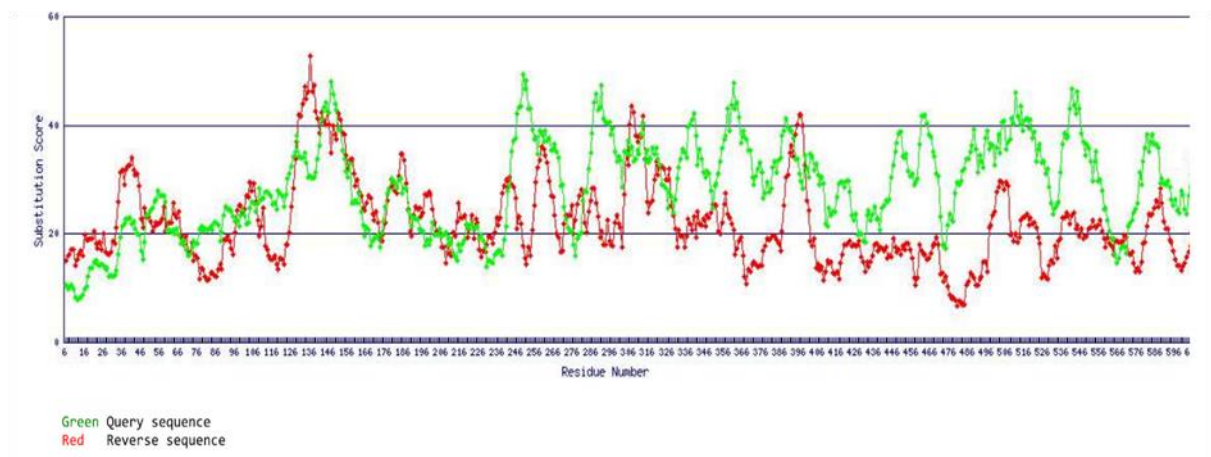

**Figure S2:** Substitution curve of FATP1, Fatty acid transport protien1
